# Supplementary material for: Synthesis of single crystalline hexagonal nanobricks of LiNi1/3Co1/3Mn1/3O2 with high percentage of exposed {010} active facets as high rate performance cathode material for lithium-ion battery
Source: Royal Society of Chemistry journal article supplement (doi:10.1039/c3ta01618h), 2013-01-01
Supplement: c3ta01618h.pdf [file c3ta01618h.pdf]

## **Electronic Supporting Information**

### **Synthesis of single crystalline hexagonal nanobricks of $\text{LiNi}_{1/3}\text{Co}_{1/3}\text{Mn}_{1/3}\text{O}_2$ with high percentage of exposed {010} active facets as high rate performance cathode material for lithium-ion battery**

**Fang Fu, Gui-Liang Xu, Qi Wang, Ya-Ping Deng, Xue Li, Jun-Tao Li,  
Ling Huang, and Shi-Gang Sun\***

State Key Laboratory of Physical Chemistry of Solid Surfaces, Department of  
Chemistry, College of Chemistry and Chemical Engineering, School of Energy  
Research, Xiamen University, Xiamen 361005, China

\*Corresponding author, Tel & Fax: (+86)592-2180181, E-mail: sgsun@xmu.edu.cn

## Experimental Section

**Preparation of Materials:**  $\text{LiNi}_{1/3}\text{Mn}_{1/3}\text{Co}_{1/3}\text{O}_2$  was prepared by a solid-state reaction from lithium hydroxide ( $\text{LiOH}\cdot\text{H}_2\text{O}$ ) and nickel-cobalt-manganese hydroxide precursor. The precursor was prepared by a surfactant-assisted coprecipitation method from  $0.8\text{ mol dm}^{-3}$  of  $\text{NiSO}_4\cdot 6\text{H}_2\text{O}$ ,  $\text{CoSO}_4\cdot 7\text{H}_2\text{O}$ , and  $\text{MnSO}_4\cdot 7\text{H}_2\text{O}$  (Co:Ni:Mn = 1:1:1 in the molar ratio) aqueous solution and  $2.0\text{ mol dm}^{-3}$  of NaOH aqueous solution with the desired amount of  $\text{NH}_4\text{OH}$ . 1.0 g of anionic surfactant PVP as an adsorbent was also added into the solution before reaction. The solutions were mixed slowly under a nitrogen atmosphere, and the pH of the mixed solution was kept in the range of 11-12 during the precipitation process. Finally, the precipitated  $\text{Ni}_{1/3}\text{Mn}_{1/3}\text{Co}_{1/3}(\text{OH})_2$  particles were filtered, washed with water several times, and then vacuum-dried at  $120\text{ }^\circ\text{C}$  for overnight. The as-prepared  $\text{Ni}_{1/3}\text{Mn}_{1/3}\text{Co}_{1/3}(\text{OH})_2$  was then mixed with LiOH in the molar ratio of 1.0:1.06 by ball milling in the corundum vial with corundum balls for 5 h using a Retsch PM 100 planetary mill, in which 6% of excess lithium was added to compensate for the lithium evaporation during the calcinations. The speed was 500 rpm and the ball-to-material ratio was 20:1. The effect of the ball milling on the morphology of  $\text{Ni}_{1/3}\text{Mn}_{1/3}\text{Co}_{1/3}(\text{OH})_2$  nanoplates precursor has been investigated by SEM. The SEM image of the precursor after 5 h ball milling is depicted in Figure S9. The Figure S9 illustrates the precursor still keeps the original hexagonal nanoplates shape after ball milling for 5 h. The ball milling did not destroy its structure. It may be due to that the particle size of these nanoplates is relatively small, which are about 50-200 nm in

edge length and 10 nm in thickness, so that the power of ball milling at a speed of 500 rpm could not destroy its structure. After suitable grinding, the mixture was annealed in air, first at 450 °C for 6 h, and then at 900 °C for 12 h. The final material was obtained by cooling them to room temperature in the furnace.

**Sample Characterization:** Products were thoroughly characterized by XRD (Philips X'Pert Pro Super X-ray diffractometer, Cu K $\alpha$  radiation), SEM (Hitachi S-4800 SEM), and TEM (JEOL JEM-2100 microscope).

**Electrochemical Tests:** Electrochemical properties of the LNCM nanobrick electrodes were measured by assembling them into coin cells (type CR2025) in an argon-filled glove box. The cathode was prepared by spreading a mixture of 80 wt% active material, 10 wt% acetylene black, and 10 wt% LA132 onto an Al foil current collector. The obtained electrodes were dried at 120 °C for 10 h in vacuum. Lithium foil was used as anode and Celgard-2400 membrane as the separator. The electrolyte was 1 M LiPF<sub>6</sub> dissolved in a mixture of ethylene carbonate (EC) / dimethyl carbonate (DMC) / diethyl carbonate (DEC) (1:1:1 in volume). The cells were galvanostatically charged and discharged in the voltage range of 2.5-4.6 V on a battery test system (LAND-V34, Land Electronic Co., Ltd., Wuhan). A 1 C rate is equivalent to 160 mA·g<sup>-1</sup> in our definition.

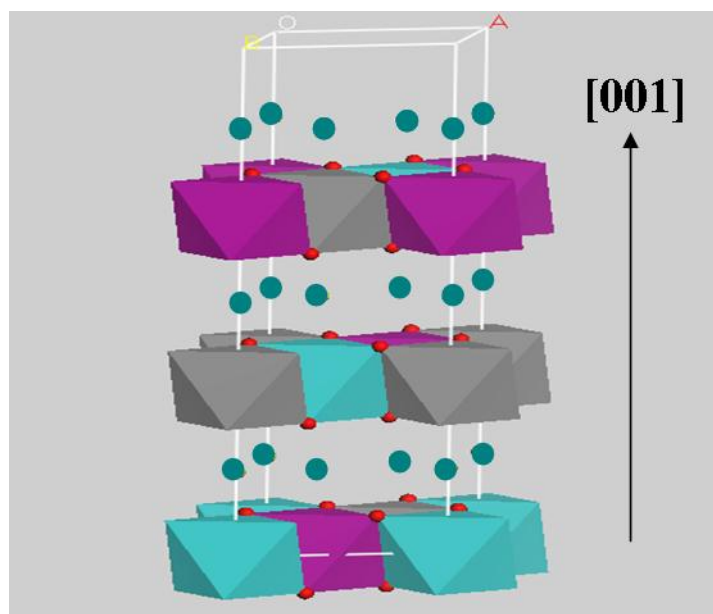

**Figure S1.** Crystal structure of  $\text{LiNi}_{1/3}\text{Mn}_{1/3}\text{Co}_{1/3}\text{O}_2$ . The red and green spheres are oxygen and lithium atoms, respectively. The octahedra represents  $\text{MO}_6$  unit.

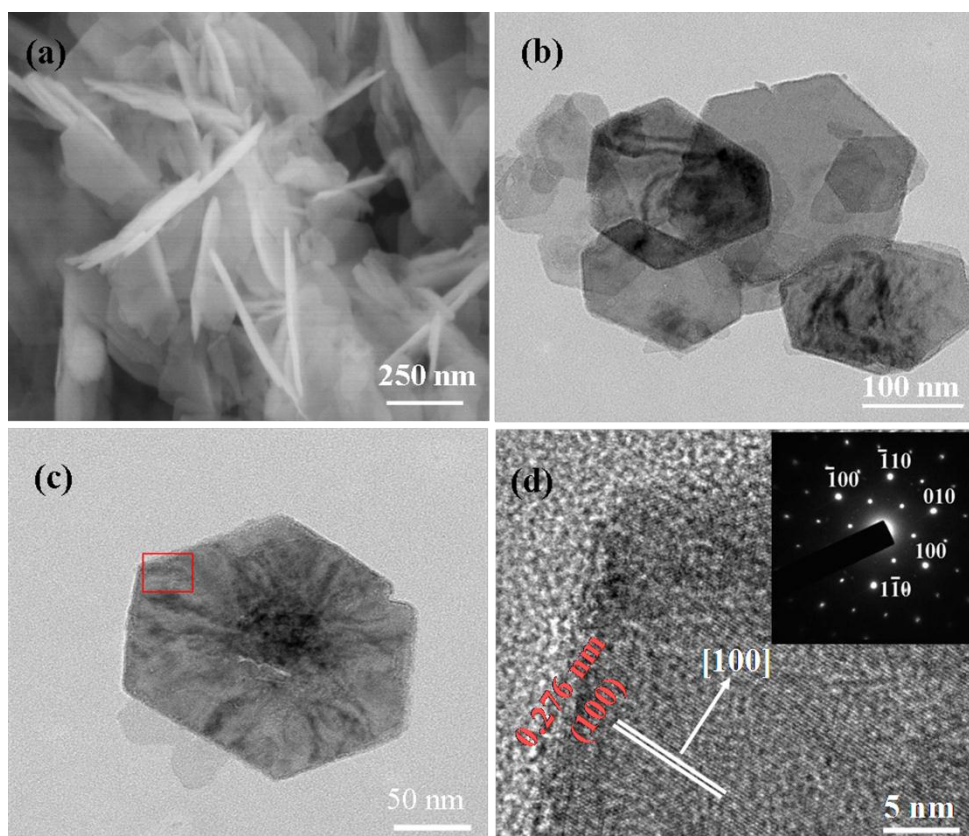

**Figure S2.** SEM image (a) and TEM images (b,c) of  $\text{Ni}_{1/3}\text{Mn}_{1/3}\text{Co}_{1/3}(\text{OH})_2$  hexagonal nanosheets. (d) HRTEM image of the region marked by red square in (c), inset is SAED of (c).

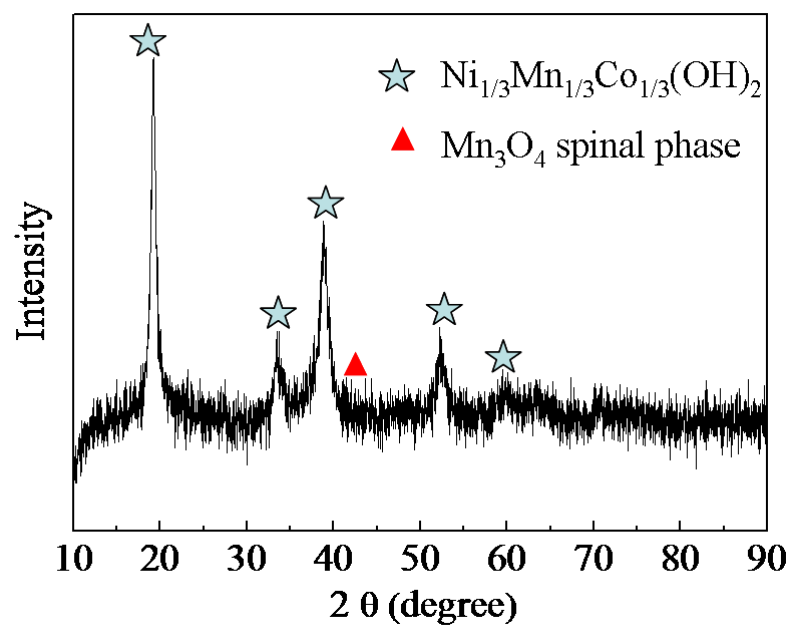

**Figure S3.** XRD pattern of the  $\text{Ni}_{1/3}\text{Mn}_{1/3}\text{Co}_{1/3}(\text{OH})_2$  precursor

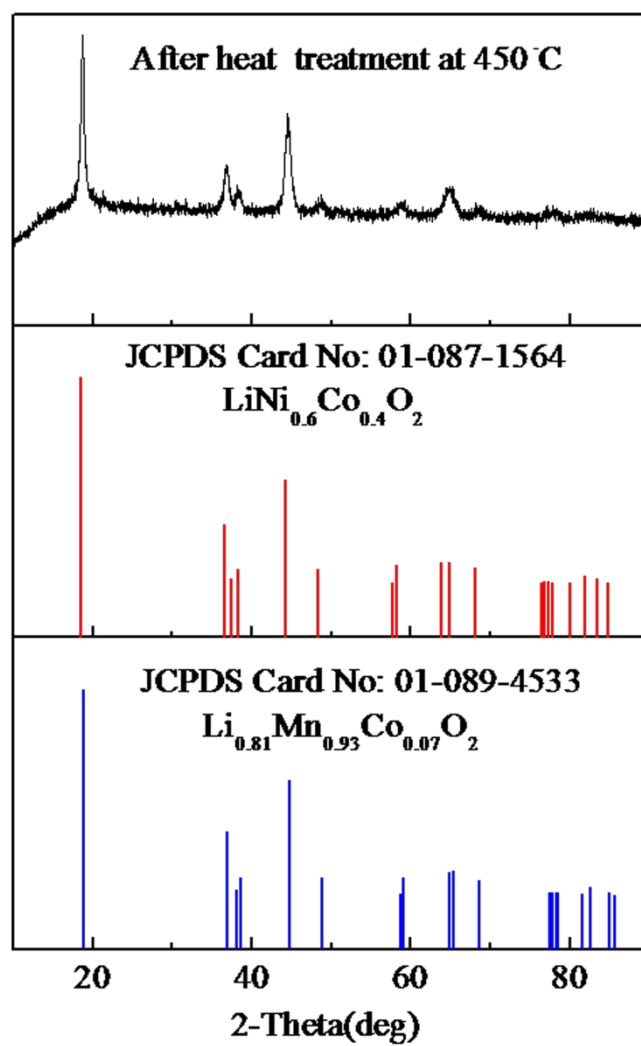

**Figure S4.** XRD pattern of the precursor after heat treatment at 450 °C

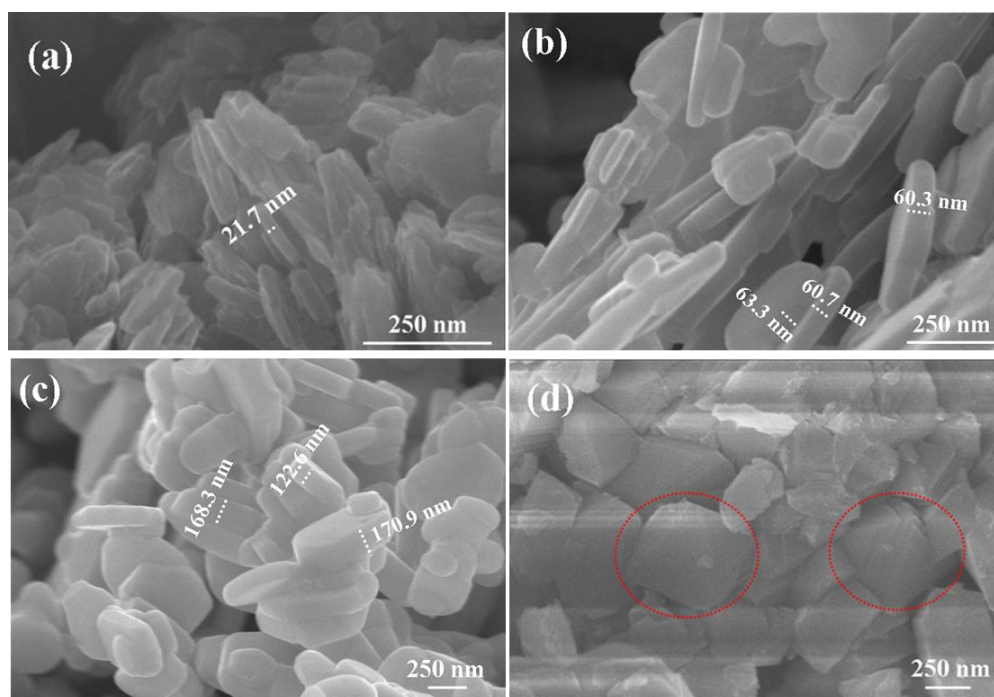

**Figure S5.** SEM images of the LNCM nanocrystals prepared at different temperatures

(a) 450 °C, (b) 800 °C, (c) 900 °C, (d) 1000 °C.



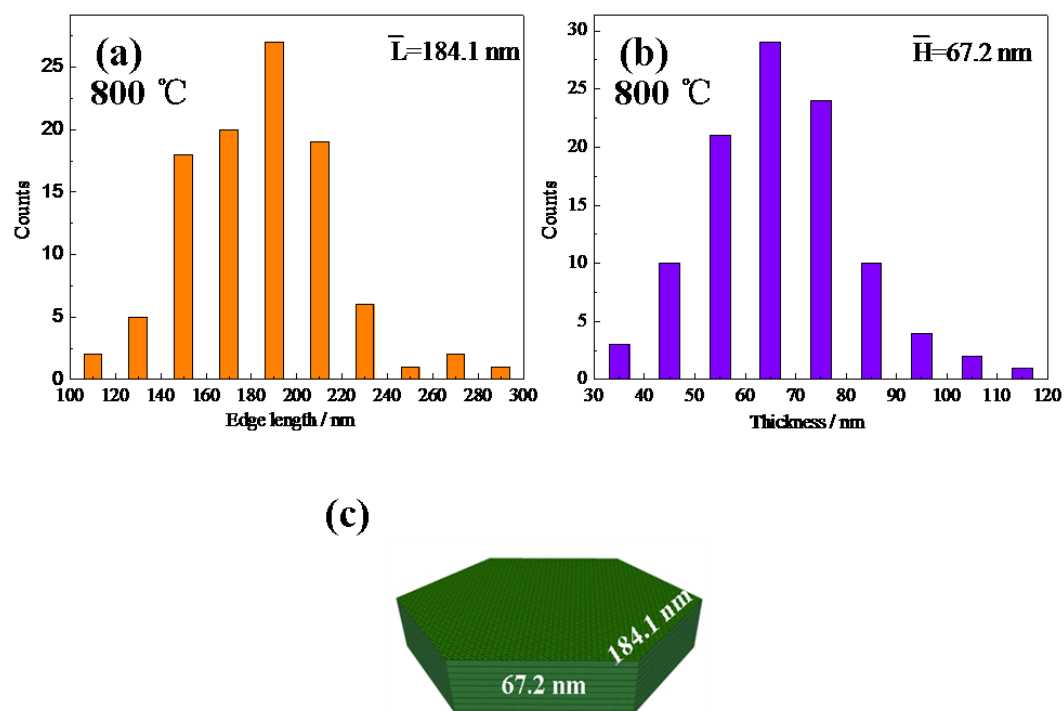

**Figure S6.** (a) Edge length and (b) thickness distribution of LNCM nanobricks prepared at 800 °C. (c) Schematic drawing of a single hexagonal nanobrick.

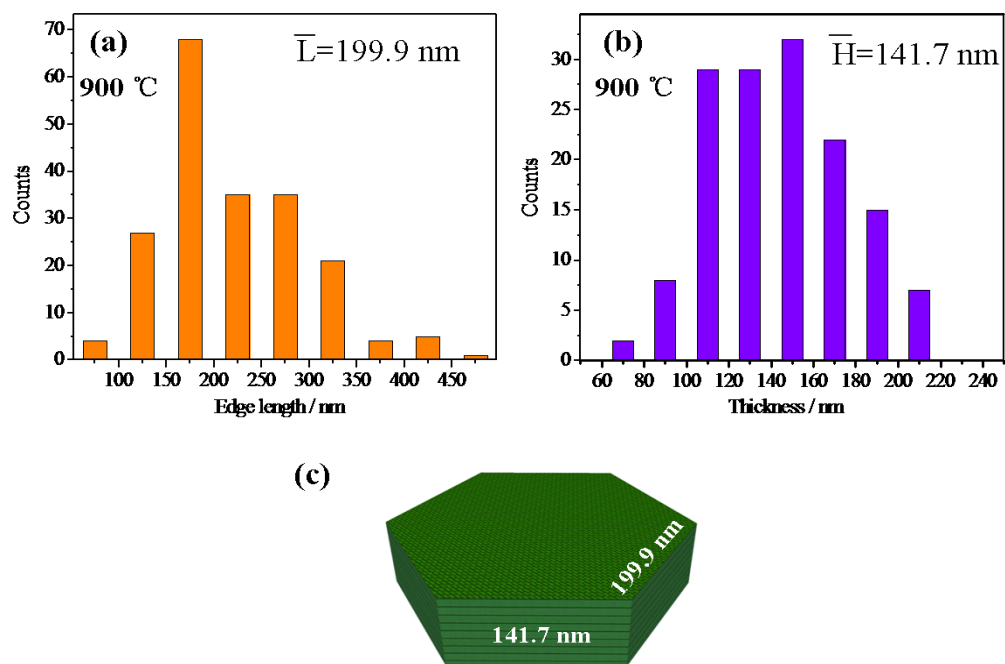

**Figure S7.** (a) Edge length and (b) thickness distribution of LNCM nanobricks prepared at 900 °C. (c) Schematic drawing of a single hexagonal nanobrick.

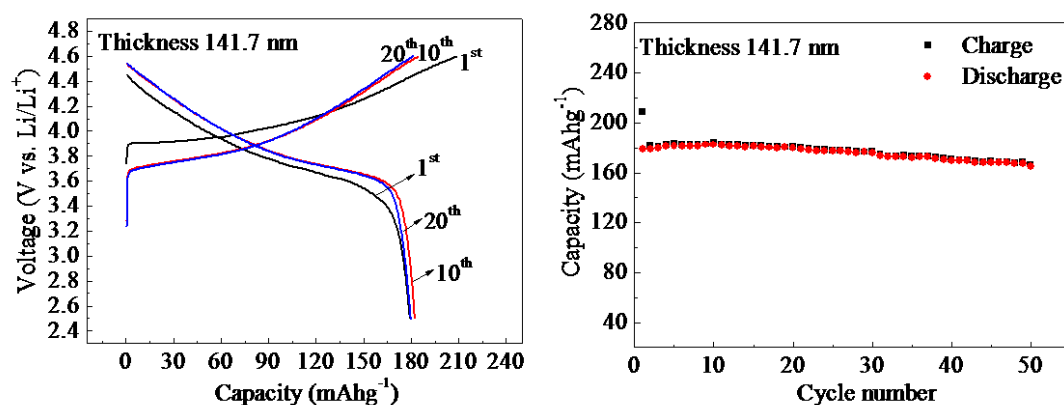

**Figure S8.** (a) Charge and discharge curves of the LNCM nanobricks at a rate of 1 C in the voltage range between 2.5-4.6 V. (b) Cycling performance of the LNCM nanobricks at a rate of 1 C.

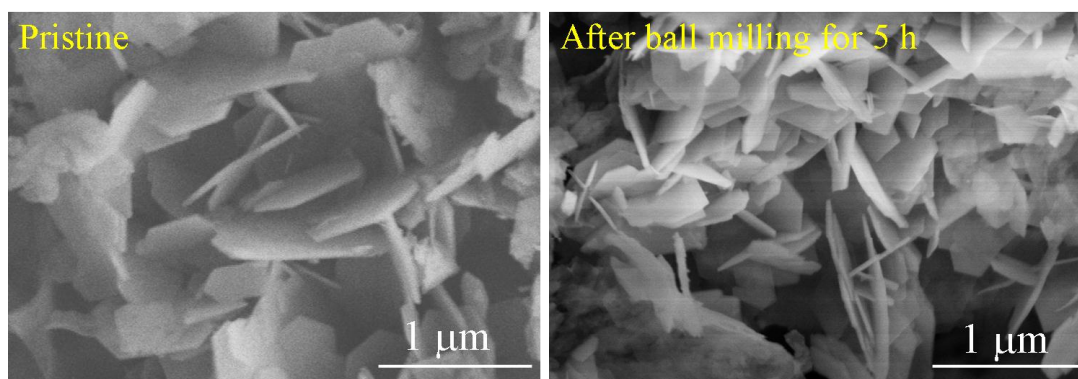

**Figure S9.** SEM images of the  $\text{Ni}_{1/3}\text{Mn}_{1/3}\text{Co}_{1/3}(\text{OH})_2$  nanoplates precursor before (left) and after ball milling for 5 h(right).
